## EDITORIAL VIEWS

Anesthesiology  
75:927-931, 1991

## EDRF/Nitric Oxide

### *The Endogenous Nitrovasodilator and a New Cellular Messenger*

Anesthesiologists have been using sodium nitroprusside, nitroglycerin, and other nitrovasodilators in their clinical practice for more than two decades. The action of all of these drugs is mediated by their common metabolism or spontaneous reduction to nitric oxide (NO).<sup>1</sup> Recently, an "endogenous nitrovasodilator" has been discovered<sup>2</sup> which promises to be of enormous physiologic, pathophysiologic, and clinical significance. This substance, endothelium-derived relaxing factor (EDRF), appears to be NO itself or a similar NO-containing species such as a nitrosothiol. First reported in vascular endothelium,<sup>2</sup> where it serves as a potent determinant of basal and induced vasodilator tone, EDRF/NO was found to be a labile, diffusible factor released from the endothelium under basal conditions and in response to a wide variety of endogenous hormones and chemicals that increase intracellular calcium (*e.g.*, adenosine triphosphate, adenosine diphosphate, bradykinin, histamine, and thrombin). The increase in calcium stimulates the production of EDRF/NO from the amino acid L-arginine by EDRF/NO synthase, a constitutive enzyme that is calcium-, calmodulin-, and nicotinamide adenine dinucleotide phosphate-dependent. Once produced, EDRF/NO diffuses to the vascular smooth muscle, where it activates soluble guanylate cyclase, resulting in the production of cyclic guanosine monophosphate (GMP) from guanosine tri-

phosphate, which in turn leads to vasodilation. (For review, see reference 3 and footnote.\*)

The implications of EDRF/NO go well beyond its actions in the endothelial cell and blood vessels. This L-arginine-to-NO pathway appears to be the transduction mechanism for the activation of soluble guanylate cyclase in all cells in which the cyclase is present.<sup>3</sup> It is a newly discovered mechanism by which cells regulate their own function and influence that of others. This cell messenger function of EDRF/NO has been most extensively studied in the vascular, immune, and nervous systems. In the vasculature it is a potent vasodilator that also inhibits platelet aggregation and adhesion.<sup>3,\*</sup> In the immune system, it is an effector mechanism for macrophage-induced cytotoxicity,<sup>4,5</sup> whereas in the nervous system it is a neurotransmitter in several specific neural pathways.<sup>6,7</sup>

Although there is now extensive literature on the physiologic and pathophysiologic implications of EDRF/NO, Fratacci *et al.*,<sup>8</sup> in this issue of ANESTHESIOLOGY, present one of the first therapeutic applications of these exciting and promising new research findings. They describe the novel use of inhaled low concentrations of NO to selectively vasodilate the pulmonary vascular bed and to reverse heparin-protamine vasoconstriction in sheep. This, along with the initial report by these authors in *Circulation*,<sup>9</sup> is a landmark finding in pulmonary vascular research. Pulmonary hypertension is a hemodynamic abnormality that is shared by a variety of acute and chronic pulmonary disease states. Regardless of the etiology of pulmonary hypertension, the increased pressure in the pulmonary circulation results in a progressive inability of

Accepted for publication July 26, 1991. Supported in part by National Institutes of Health grants R29HL3706 and P01-HL19242.

Address reprint requests to Dr. Johns: Department of Anesthesiology, Box 238, University of Virginia Health Sciences Center, Charlottesville, Virginia 22908.

Key words: Circulation: pulmonary. Endothelium: endothelium-derived relaxing factor; nitric oxide. Hypertension: pulmonary.

\* Johns RA: Endothelium-derived relaxing factor: Basic review and clinical implications. *J Cardiothorac Vasc Anesth* 5:69-79, 1991.

the right ventricle to sustain its output and frequently leads to right ventricular failure and death. Interventions that reduce right ventricular afterload, thereby improving right ventricular function, have long been sought, and many different vasodilator agents have been used in an attempt to achieve such a goal. The optimal vasodilator would selectively dilate the pulmonary vasculature without altering systemic vascular resistance. Unfortunately, no selective or even highly preferential pulmonary vasodilator agent—until now—had been identified.

Inhaled NO may prove to be of tremendous clinical benefit in the management of the acute pulmonary hypertension associated with a wide variety of disease states, including adult respiratory distress syndrome and persistent pulmonary hypertension of the newborn, as well as in the intraoperative management of patients with elevated pulmonary vascular resistance. One particularly notable situation would be the child with congenital heart disease and pulmonary hypertension undergoing surgical repair. It is often impossible to separate such children from cardiopulmonary bypass because of right ventricular failure due to the elevated pulmonary vascular resistance. Administration of traditional vasodilators in this situation often results in disastrous systemic hypotension. A selective pulmonary vasodilator administered in the perioperative period would be of tremendous advantage.

Nevertheless, in approaching the therapeutic application of inhaled NO, its potential for serious, even lethal, toxicity must be given due consideration. First known as a toxin and air pollutant, NO is the etiologic agent in the pulmonary complications of silo filler's disease. Although high concentrations of NO (greater than 5,000 ppm) have proven lethal in animal studies,<sup>10</sup> the concentrations of NO required for selective pulmonary vasodilation (180 ppm and less) appeared to be without direct toxic effects when administered for short periods of time. Consideration must be given to cumulative direct cytotoxic effects of NO with prolonged administration as well as to the effect of increased plasma concentrations of nitrites, nitrates, and the toxic nitrogen dioxide gas—all products of the reaction of NO with oxygen.

NO binds to the iron of heme-based proteins and thus is avidly bound and inactivated by hemoglobin. The short half-life of NO in combination with its rapid inactivation by hemoglobin is likely to account for the pulmonary vascular selectivity observed. It is ironic that this interaction with hemoglobin, while providing pulmonary selectivity, may limit the use of NO to anything but the more acute and transient forms of pulmonary hypertension. As discussed by Fratacci *et al.*,<sup>8</sup> nitrosylhemoglobin is oxidized to methemoglobin, which accumulates during the course of NO inhalation. It is also extremely important to realize that NO may bind not just to hemoglobin and guanylate cyclase, but to any heme-based enzyme. Indeed, inactivation

of cytochromes required for electron transport<sup>11</sup> and of other iron-centered heme- and non-heme-based enzymes such as lipoxygenase<sup>12</sup> has been observed with exogenous *in vitro* administration of NO. Although human trials of inhaled NO may be justified in clinical situations that, untreated, are likely to be fatal and for which no other therapy is available, attempts at widespread application must await more extensive animal studies of its potential toxicity.

This use of NO as a selective pulmonary vasodilator is only a beginning to the unfathomed clinical applications that may come from our understanding of the role of EDRF/NO in normal physiology and in disease. A brief overview of recent findings will allow an appreciation of the vast clinical implications of this peculiar new cell messenger.

NO may serve multiple functions within the central nervous system.<sup>13-15</sup> The central neurotransmitters acetylcholine, glutamate, and glycine have been known for some time to cause elevation of cyclic GMP levels in the brain. The L-arginine-to-EDRF/NO pathway is now known to be the mechanism by which cyclic GMP is stimulated by these neurotransmitters. This L-arginine-to-NO pathway also has been shown to mediate nonadrenergic, noncholinergic neurotransmission.<sup>16</sup> EDRF/NO also has been implicated in the peripheral analgesic effect of acetylcholine<sup>17</sup> and in peripheral nociceptive mechanisms.<sup>18</sup> In addition to its function as a neurotransmitter, NO, as a free radical, has recently been suggested to be involved in the neurocytotoxicity of Alzheimer's disease, Huntington's disease, and cerebral ischemia.<sup>19</sup>

In contrast to the constitutive form of EDRF/NO synthase discussed above, macrophages contain an inducible form of the enzyme, which appears to be less tightly regulated and which is capable of NO synthesis for extended periods of time.<sup>20</sup> This enzyme is induced in response to endotoxin (lipopolysaccharide) and several cytokines, including  $\gamma$  interferon and tumor necrosis factor. Although this form of the enzyme is present in the macrophage under basal conditions, it is present in endothelium or vascular smooth muscle only following induction by cytokines.<sup>21</sup> This enzyme now appears to be inducible in a wide range of cell types. The NO produced by macrophages appears to perform a "killer" function important to immune defenses.<sup>22,23</sup> The induction of this form of EDRF/NO synthase in endothelium and vascular smooth muscle during endotoxin shock is believed to be related to the severe hypotension observed during sepsis.<sup>24,25</sup> The massive production of NO also may contribute to the cytotoxicity of sepsis and other disease states, including hepatic cirrhosis,<sup>26,27</sup> and has been implicated in ischemia-reperfusion injury and reactive hyperemia.<sup>28,29</sup>

The physiologic and pathophysiologic significance of EDRF has been most extensively investigated in the vas-

cular system, where EDRF activity is present from conduit arteries to microvessels and is conserved across species. The tonic release of EDRF plays an important role in modulating systemic and pulmonary vascular resistance. The EDRF/NO synthase inhibitor, N<sup>G</sup>-monomethyl-L-arginine, administered intravenously to rats, rabbits, or guinea pigs results in a marked hypertension that is immediately reversible by an excess of L-arginine.<sup>30</sup> This increased blood pressure is accompanied by a decrease in the vascular conductance of the renal, mesenteric, carotid, and hind quarters vascular beds of conscious, chronically instrumented rats.<sup>31</sup> Most importantly, these changes persisted through 6 h of N<sup>G</sup>-monomethyl-L-arginine infusion, demonstrating an inability of vascular regulatory mechanisms to reaccommodate blood flow toward pretreatment levels, as would normally occur with exogenously administered vasoconstrictors. Such a profound response suggests that the basal release of EDRF is a critical component of local vascular control. The production of EDRF in response to increased blood flow has been demonstrated to be the mechanism responsible for the flow-induced vasodilation of coronary arteries and other vessels.<sup>32,33</sup>

EDRF release and activity are markedly impaired in atherosclerosis and hypertension in humans and in a wide variety of animal models,<sup>3,4,34-36</sup> and this messenger molecule also may be involved in the pathogenesis of these disease states. EDRF/NO inhibits the release of renin<sup>37</sup> and prevents proliferation of vascular smooth muscle cells by cyclic GMP-mediated mechanisms.<sup>38</sup> In addition, EDRF/NO inhibits the release of mitogens from human platelets.<sup>39</sup> Impairment of EDRF/NO production has been observed in pregnancy-induced hypertension.<sup>40</sup>

Decreased EDRF activity may play a critical role in the etiology of coronary vasospasm.<sup>3,4,41</sup> Human atherosclerotic coronary arteries have a diminished or obliterated EDRF response. Serotonin, norepinephrine, and other contractile agonists normally cause the release of EDRF from endothelium, which modulates their direct contractile responses.<sup>42</sup> Serotonin, for example, induces a six-fold greater contraction of endothelium-denuded coronary arteries compared to those with an intact endothelium. Aggregating platelets release a wide variety of vasoactive agents, including the endothelium-dependent dilators, serotonin, thrombin, and adenosine diphosphate. In the absence of endothelium, the net effect of aggregating platelets is to vasoconstrict coronary arteries, in contrast to the vasodilation that is observed when the coronary endothelium is intact. Another very important physiologic action of EDRF/NO is the inhibition of both platelet aggregation and adhesion.<sup>3</sup> Thus, impaired endothelial cell function—through extensive intimal damage by atherosclerosis or as a result of ischemia—will promote vasospasm as well as clot formation through increased

platelet aggregation and adhesion. Impaired EDRF production has also been demonstrated following balloon angioplasty<sup>43</sup> as well as in internal mammary and venous coronary bypass grafts following their manipulation and preparation for grafting.<sup>44</sup>

The binding of EDRF/NO by hemoglobin has been implicated in the vasospasm following subarachnoid hemorrhage. Endothelium-dependent relaxation of the canine basilar artery has been shown to be inhibited by hemoglobin and by cerebrospinal fluid obtained from patients with subarachnoid hemorrhage.<sup>45</sup>

EDRF/NO is also important in the physiology and pathophysiology of the pulmonary circulation, where it contributes significantly to the low resting tone characteristic of this vascular bed.<sup>46</sup> Endothelial damage and impaired EDRF production have been proposed as contributing factors in both acute and chronic pulmonary hypertension.<sup>46</sup> The modulation of EDRF production by high and low oxygen tensions is especially important in the pulmonary circulation. Hypoxia inhibits EDRF synthase by limiting the availability of molecular oxygen, a substrate for the enzyme, whereas hyperoxia reacts with and inactivates EDRF/NO following its production.<sup>47</sup> Inhibition of EDRF by hypoxia may contribute to hypoxic pulmonary vasoconstriction, and decreased EDRF production due to endothelial damage and hypoxia in areas of pulmonary inflammation may be important in maintaining ventilation-perfusion matching.

Both local<sup>48</sup> and inhalational anesthetics<sup>49,50</sup> have been shown to inhibit EDRF production in isolated blood vessels. Given the wide-ranging functions of EDRF/NO, this action of local and inhalational anesthetics is especially intriguing. Is this a significant component of the vascular actions of anesthetics *in vivo*? Are the effects of anesthetics altered in disease states that impair endothelial cell function, such as hypertension, atherosclerosis, adult respiratory distress syndrome, cerebral vasospasm, or ischemia-reperfusion injury? By inhibiting EDRF/NO production, do anesthetics alter immune function? As the specific functions of EDRF/NO as a neurotransmitter become apparent, it will be especially tantalizing to explore whether inhibition of this L-arginine-to-EDRF pathway plays a role in the central nervous system effects of anesthetics.

EDRF/NO is a newly recognized cellular messenger responsible for the activation of soluble guanylate cyclase and the production of cyclic GMP. It is responsible for the control of vital functions in the vascular, immune, and central nervous systems. Its absence or excessive production have been implicated in a wide variety of disease states. Fratacci *et al.*<sup>8</sup> have clearly demonstrated that NO has direct clinical applications as a selective pulmonary vasodilator. Further clinical applications of NO, of ana-

logues of NO, and of newly developed inhibitors of EDRF/NO synthesis are sure to be forthcoming.

ROGER A. JOHNS, M.D.

*Associate Professor of Anesthesiology*

*University of Virginia Health Sciences Center*

*Charlottesville, Virginia*

## References

1. Arnold WP, Mittal CK, Katsuki S, Murad F: Nitric oxide activates guanylate cyclase and increases 3'-5'-cyclic monophosphate levels in various tissue preparations. *Proc Natl Acad Sci USA* 74:3203-3207, 1977
2. Furchgott RF, Zawadzki JV: The obligatory role of endothelial cells in the relaxation of arterial smooth muscle by acetylcholine. *Nature* 288:373-376, 1980
3. Moncada S, Palmer RMJ, Higgs EA: Nitric oxide: Physiology, pathophysiology, and pharmacology. *Pharmacological Rev* 43:108-142, 1991
4. Hibbs JB, Taintor RR, Vavrin Z, Rachlin EM: Nitric oxide: A cytotoxic activated macrophage effector molecule. *Biochem Biophys Res Commun* 157:87-94, 1988
5. Hibbs JB, Vavrin Z, Taintor RR: L-arginine is required for expression of the activated macrophage effector mechanism causing selective metabolic inhibition in target cells. *J Immunol* 138:550-565, 1987
6. Garthwaite J, Charles SL, Chess-Williams R: Endothelium-derived relaxing factor release on activation of NMDA receptors suggests role as intercellular messenger in the brain. *Nature* 336:385-388, 1988
7. Bredt DS, Hwang PM, Snyder SH: Localization of nitric oxide synthase indicating a neural role for nitric oxide. *Nature* 347:768-770, 1990
8. Fratacci MD, Frostell CG, Tong-Yen C, Wain JC, Robinson DR, Zapol WM: Inhaled nitric oxide: A selective pulmonary vasodilator of heparin-protamine vasoconstriction in sheep. *ANESTHESIOLOGY* 75:990-999, 1991
9. Frostell C, Fratacci MD, Wain JC, Jones R, Zapol WM: Inhaled nitric oxide: A selective pulmonary vasodilator reversing hypoxic pulmonary vasoconstriction. *Circulation* 83:2038-2047, 1991
10. Greenbaum R, Bay J, Hargreaves MD, Kain ML, Kelman GR, Nunn JF, Prys-Roberts C, Siebold K: Effects of higher oxides of nitrogen on the anesthetized dog. *Br J Anaesth* 39:393-404, 1967
11. Yoshimura T: Spectral properties of nitric oxide complexes of cytochrome *c* from *Alcaligenes sp.* NCIB 11015. *Biochemistry* 25:2436-2442, 1986
12. Light DB, Schwiebert EM, Karlson KH, Stanton BA: Atrial natriuretic peptide inhibits a cation channel in renal inner medullary collecting duct cells. *Science* 243:383-385
13. Garthwaite J: Glutamate, nitric oxide and cell-cell signalling in the nervous system. *Trends Neurosci* 14:60-67, 1991
14. Snyder SH, Bredt DS: Nitric oxide as a neuronal messenger. *Trends Pharmacol Sci* 12:125-128, 1991
15. Knowles RG, Palacios M, Palmer RMJ, Moncada S: Formation of nitric oxide from L-arginine in the central nervous system: A transduction mechanism for stimulation of the soluble guanylate cyclase. *Proc Natl Acad Sci USA* 86:5159-5162, 1989
16. Duarte IDG, Lorenzette BB, Ferreira SH: Acetylcholine induces peripheral analgesia by the release of nitric oxide, Nitric Oxide from L-Arginine: A Bioregulatory System. Edited by Moncada S, Higgs EA. Amsterdam, Elsevier, 1990, pp 165-170
17. Meller ST, Lewis SJ, Bates JN, Brody MJ, Gebhart GF: Is there a role for an endothelium-derived relaxing factor in nociception? *Brain Res* 531:342-345, 1990
18. Gillespie JS, Liu X, Martin WL: The effect of L-arginine and N<sup>G</sup>-monomethyl-L-arginine on the response of the rat anococcygeus to NANC nerve stimulation. *Br J Pharmacol* 98:1080-1082, 1989
19. Hoffman M: A new role for gases: Neurotransmission. *Science* 252:1788, 1991
20. Nathan CF, Stuehr DJ: Does endothelium-derived nitric oxide have a role in cytokine-induced hypotension? (comment). *J Natl Cancer Inst* 82:726-728, 1990
21. Kilbourn RG, Gross SS, Jubran A, Adams J, Griffith OW, Levi R, Lodato RF: N<sup>G</sup>-methyl-L-arginine inhibits tumor necrosis factor-induced hypotension: Implications for the involvement of nitric oxide. *Proc Natl Acad Sci USA* 87:3629-3632, 1990
22. Hibbs JB, Vavrin Z, Taintor RR: L-arginine is required for expression of the activated macrophage effector mechanism causing selective metabolic inhibition in target cells. *J Immunol* 138:550-565, 1987
23. Stuehr D, Gross S, Sakuma L, Levi R, Nathan C: Activated murine macrophages secrete a metabolite of arginine with the bioactivity of endothelium-derived relaxing factor and the chemical reactivity of nitric oxide. *J Exp Med* 169:1011-1020, 1989
24. Kilbourn RG, Jubran A, Gross SS, Griffith OW, Levi R, Adams J, Lodato RF: Reversal of endotoxin-mediated shock by N<sup>G</sup>-methyl-L-arginine, an inhibitor of nitric oxide synthesis. *Biochem Biophys Res Commun* 172:1132-1138, 1990
25. Fleming I, Gray GA, Julou-Schaeffer G, Parratt JR, Stoclet JC: Incubation with endotoxin activates the L-arginine pathway in vascular tissue. *Biochem Biophys Res Commun* 171:562-568, 1990
26. Green SJ, Mellouk S, Hoffman SL, Meltzer MS, Nacy CA: Cellular mechanisms of nonspecific immunity to intracellular infection: Cytokine-induced synthesis of toxic nitrogen oxides from L-arginine by macrophages and hepatocytes. *Immunology Lett* 25:15-20, 1990
27. Vallance P, Moncada S: Hyperdynamic circulation in cirrhosis: A role for nitric oxide? *Lancet* 337:776-778, 1991
28. Masini E, Bianchi S, Mugnai L, Gambassi F, Lupini M, Pistelli A, Mannaioni PF: The effect of nitric oxide generators on ischemia reperfusion injury and histamine release in isolated perfused guinea-pig heart. *Agents Actions* 33:53-56, 1991
29. Leffer AM, Tsao PS, Leffer DJ, Ma XL: Role of endothelial dysfunction in the pathogenesis of reperfusion injury after myocardial ischemia. *FASEB J* 5:2029-2034, 1991
30. Aisaka K, Gross SS, Griffith OW, Levi R: N<sup>G</sup>-methylarginine, an inhibitor of endothelium-derived nitric oxide synthesis, is a potent pressor agent in the guinea pig: Does nitric oxide regulate blood pressure in vivo? *Biochem Biophys Res Commun* 160:881-886, 1989
31. Gardiner SM, Compton AM, Bennet T, Palmer RMJ, Moncada S: Persistent haemodynamic changes following prolonged infusions of N<sup>G</sup>-monomethyl-L-arginine (L-NMMA) in conscious rats, Nitric Oxide from L-Arginine: A Bioregulatory System. Edited by Moncada S, Higgs EA. Amsterdam, Elsevier, 1990, pp 489-491
32. Holtz J, Forstermann U, Pohl U, Giesler M, Bassenge E: Flow-dependent, endothelium-mediated dilation of epicardial coronary arteries in conscious dogs: effects of cyclooxygenase inhibition. *J Cardiovasc Pharmacol* 6:1161-1169, 1984
33. Pohl U, Holtz J, Busse R, Bassenge E: Crucial role of endothelium

- in the vasodilator responses to increased flow in vivo. Hypertension 8:37-44, 1986
34. Linder L, Kiowski W, Buhler FR, Luscher TF: Indirect evidence for release of endothelium-derived relaxing factor in human forearm circulation in vivo: Blunted response in essential hypertension. *Circulation* 81:1762-1767, 1990
  35. Panza JA, Quyyumi AA, Brush JE Jr, Epstein SE: Abnormal endothelium-dependent vascular relaxation in patients with essential hypertension. *N Engl J Med* 323:22-27, 1990
  36. Ludmer PL, Selwyn AP, Shook TL, Wayne RR, Mudge GH, Alexander RW, Ganz P: Paradoxical vasoconstriction induced by acetylcholine in atherosclerotic coronary arteries. *N Engl J Med* 315:1046-1051, 1986
  37. Vidal MJ, Romero JC, Vanhoutte PM: Endothelium-derived relaxing factor inhibits renin release. *Eur J Pharmacol* 149:401-402, 1988
  38. Nakaki T, Makayama M, Kato R: Inhibition by nitric oxide and nitric oxide-producing vasodilators of DNA synthesis in vascular smooth muscle cells. *Eur J Pharmacol* 189:347-353, 1990
  39. Barrett ML, Willis AL, Vane JR: Inhibition of platelet-derived mitogen release by nitric oxide (EDRF). *Agents Actions* 27:488-491, 1989
  40. Pinto A, Sorrentino R, Sorrentino P, Guerritore T, Miranda L, Biondi A, Martinelli P: Endothelial-derived relaxing factor released by endothelial cells of human umbilical vessels and its impairment in pregnancy-induced hypertension. *Am J Obstet Gynecol* 164:507-513, 1991
  41. Shepherd JT, Katusic ZS, Vedernikov Y, Vanhoutte PM: Mechanisms of coronary vasospasm: role of endothelium. *J Mol Cell Cardiol* 23(suppl 1):125-131, 1991
  42. Cocks TH, Angus JA: Endothelium-dependent relaxation of coronary arteries by noradrenaline and serotonin. *Nature* 305:627-630, 1983
  43. Harrison DG: Endothelial modulation of vascular tone: Relevance to coronary angioplasty and restenosis. *J Am Coll Cardiol* 17:71B-76B, 1991
  44. Johns RA, Peach MJ, Flanagan T, Kron IL: Probing of the canine mammary artery damages endothelium and impairs vasodilation resulting from prostacyclin and endothelium-derived relaxing factor. *J Thorac Cardiovasc Surg* 97:252-258, 1989
  45. Kanamura K, Waga S, Kojima T, Fujimoto K, Niwa S: Endothelium-dependent relaxation of canine basilar arteries: Part 2. Inhibition by hemoglobin and cerebrospinal fluid from patients with aneurysmal subarachnoid hemorrhage. *Stroke* 18:938-943, 1987
  46. Peach MJ, Johns RA, Rose CE: The potential role of interactions between endothelium and smooth muscle in pulmonary vascular physiology and pathophysiology. *Pulmonary Vascular Physiology and Pathophysiology*. Edited by Weir K, Reeves JT. New York, Marcel Dekker, 1989, pp 643-697
  47. Rengasamy A, Johns RA: Characterization of endothelium-derived relaxing factor/nitric oxide synthase from bovine cerebellum and mechanism of modulation by high and low oxygen tensions. *J Pharmacol Exp Ther*, in press
  48. Johns RA: Local anesthetics inhibit endothelium-dependent vasodilation. *ANESTHESIOLOGY* 70:805-811, 1989
  49. Muldoon SM, Hart JL, Bowen KA, Freas W: Attenuation of endothelium-mediated vasodilation by halothane. *ANESTHESIOLOGY* 68:31-37, 1988
  50. Stone DJ, Johns RA: Endothelium-dependent effects of halothane, enflurane, and isoflurane on isolated rat aortic vascular rings. *ANESTHESIOLOGY* 71:126-132, 1989
